# Supplementary material
Source: Springer Nature journal article supplement (https://www.springermedizin.de/resource/supplementary/12889_2012_4494_MOESM2_ESM.pdf/9493452)
Supplement: MOESM2 [file 9493452]

**Table 1.** Overview of measurements

| Measurement                                                                                                   | Screening | Pre test | Post test<br>(6 months<br>after<br>baseline) | Follow up<br>(10 months<br>after<br>baseline) |
|---------------------------------------------------------------------------------------------------------------|-----------|----------|----------------------------------------------|-----------------------------------------------|
| Demographic characteristics                                                                                   |           | *        |                                              |                                               |
| Child behavior:                                                                                               |           |          |                                              |                                               |
| Externalizing behavior<br>(ECBI)                                                                              | *         | *        | *                                            | *                                             |
| Prosocial behavior<br>(MESSY)                                                                                 |           | *        | *                                            | *                                             |
| Temperament:<br>(CBQ)                                                                                         |           | *        | *                                            | *                                             |
| Strengths and Difficulties<br>(SDQ)                                                                           |           | *        | *                                            | *                                             |
| Genotyping<br>( <i>DRD4</i> , <i>DRD2</i> , <i>DAT1</i> ,<br><i>COMT</i> , <i>5-HTTLPR</i> ,<br><i>MAOA</i> ) |           | *        |                                              |                                               |
| Parent behavior:                                                                                              |           |          |                                              |                                               |
| PPI                                                                                                           |           | *        | *                                            | *                                             |
| Parent-child interaction:                                                                                     |           |          |                                              |                                               |
| DPICS-R                                                                                                       |           | *        | *                                            | *                                             |

*Note.* ECBI = Eyberg Child Behavior Inventory. MESSY = The Matson Evaluation of Social Skills with Youngsters. CBQ = Children's Behavior Questionnaire. SDQ = Strengths and Difficulties Questionnaire. *DRD4* = dopamine receptor D4 gene. *DRD2* = dopamine receptor D2. *DAT1* = dopamine transporter gene. *COMT* = catechol-o-methyltransferase gene. *5-HTTLPR* = serotonin-transporter gene. *MAOA* = monoamine oxidase A gene. PPI = Parenting Practices Interview. DPICS-R = Dyadic Parent-Child Interactive Coding System-Revised.
